# Supplementary material for: Water dissolvable MoS2 quantum dots/PVA film as an active material for destructible memristors
Source: Royal Society of Chemistry journal article supplement (doi:10.1039/d0nj02053b), 2020-01-01
Supplement: d0nj02053b1.pdf [file d0nj02053b1.pdf]

## Supporting Information

# Water Dissolvable MoS<sub>2</sub> Quantum Dots/ PVA film as an Active Material for Destructible Memristor

Sankalp Koduvayur Ganeshan<sup>1</sup>, Venkatarao Selamneni<sup>1</sup>, and Parikshit Sahatiya<sup>1\*</sup>

<sup>1</sup>Department of Electrical and Electronics Engineering, Birla Institute of Technology and Science Pilani Hyderabad Campus, Hyderabad 5000758, India

\*Corresponding author: E-mail: [parikshit@hyderabad.bits-pilani.ac.in](mailto:parikshit@hyderabad.bits-pilani.ac.in)

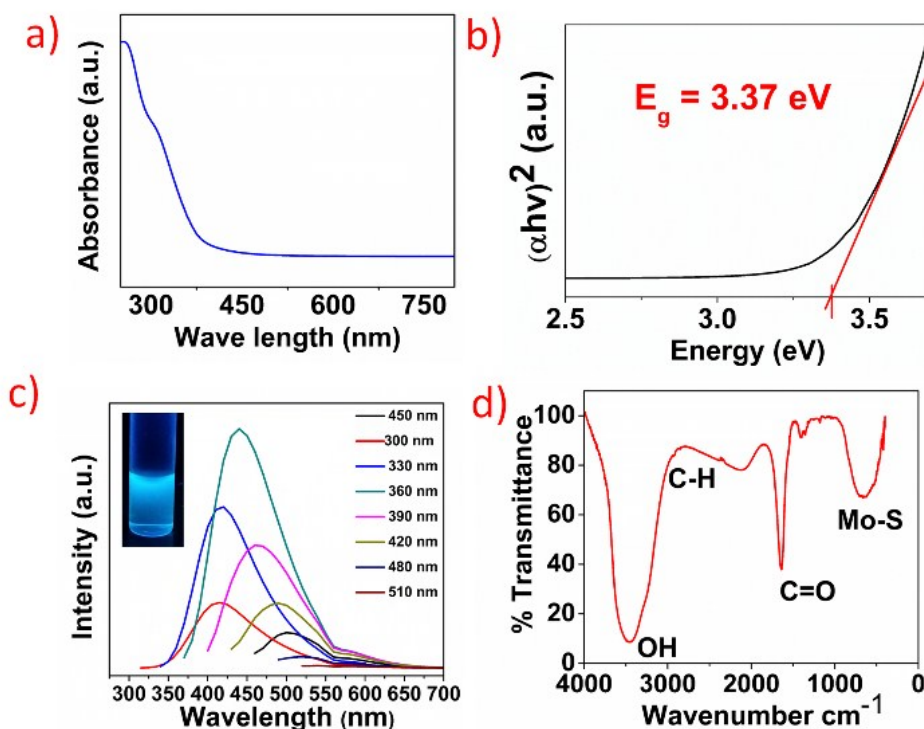

**Figure S1:** a) UV-Vis Absorption spectra of MoS<sub>2</sub> QDs b) Tauc plot of MoS<sub>2</sub> QDs c) Strong fluorescence exhibited by MoS<sub>2</sub> QDs under 365 nm UV light illumination and the Photoluminescence spectra of MoS<sub>2</sub> QD with different excitation wavelength from 300-510 nm d) FTIR spectra of the surface functionalized MoS<sub>2</sub> QDs.
